# Supplementary material for: Hydrolysis and condensation of monobutyltin chloride: reaction process analysis with DFT
Source: Royal Society of Chemistry journal article supplement (doi:10.1039/d3ra06256b), 2023-01-01
Supplement: d3ra06256b1.pdf [file d3ra06256b1.pdf]

## Supplementary Information

The Mulliken atomic charge of an arbitrary atom  $A$  is defined as:

$$q_A = Z_A - \sum_i n_{i,A} = Z_A - \sum_i \eta_i \sum_{a \in A} \Theta_{i,a} \quad (\text{S1})$$

where  $Z_A$  is the number of nuclear charges of atom  $A$ ,  $n_{i,A}$  is the contribution of atom  $A$  to occupation number of orbital  $i$ ,  $\Theta_{i,a}$  is the population of basis function  $a$  in orbital  $i$ , and  $\eta$  is the orbital occupation number.

The Mayer bond order between atoms  $A$  and  $B$  is defined as:

$$I_{AB} = \sum_{a \in A} \sum_{b \in B} [(PS)_{ba}(PS)_{ab} + (P^S S)_{ba}(P^S S)_{ab}] \quad (\text{S2})$$

where  $\mathbf{P}$ ,  $\mathbf{P}^S$ , and  $\mathbf{S}$  are the total density matrix, spin density matrix, and overlap matrix, respectively, while  $a$  and  $b$  are basis functions.

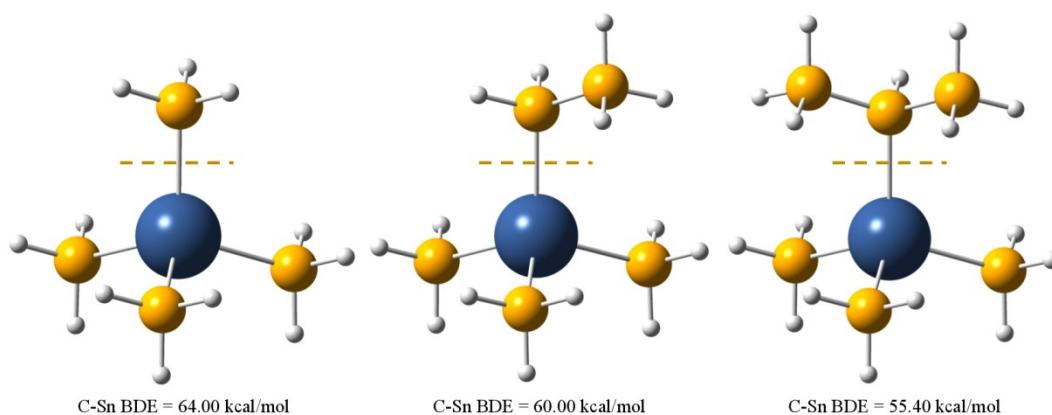

Figure S1. Schematic diagrams of the structures of organotin compounds with the known experimental BDEs of the C-Sn bond.

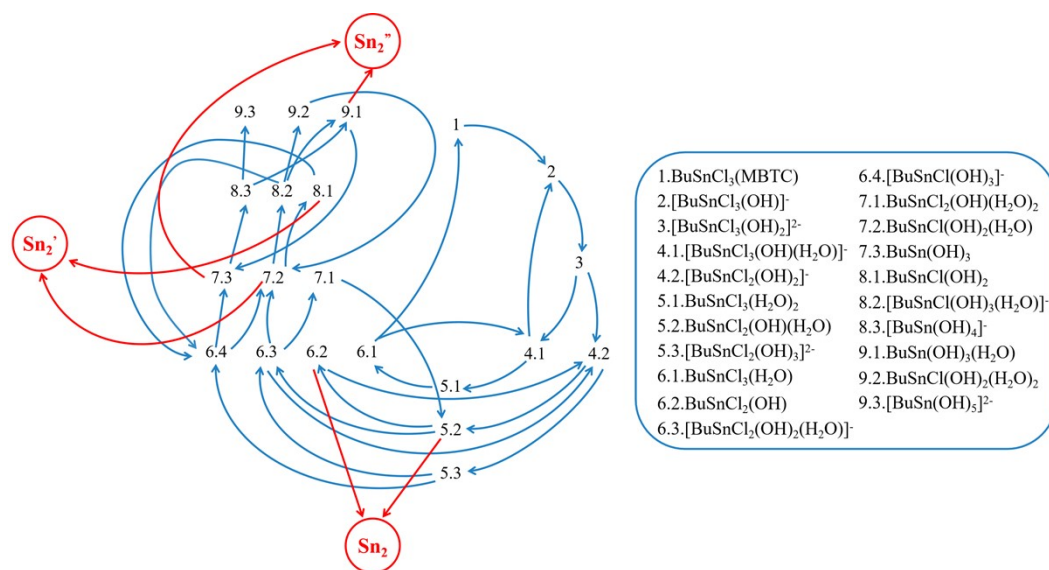

(a)

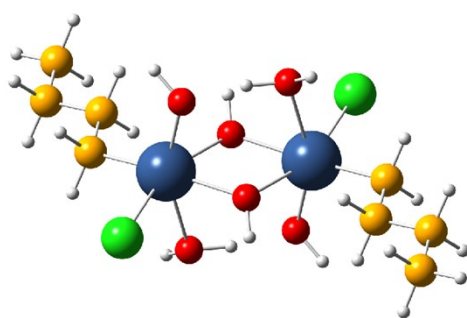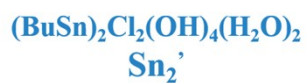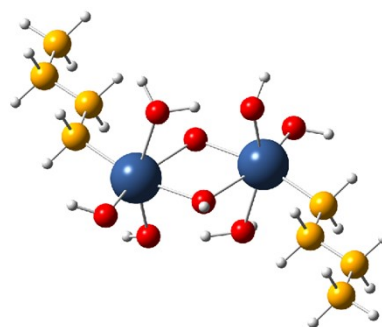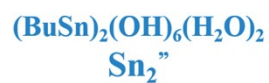

(b)

Figure S2. (a) All species and feasible reactions considered in the present work. The species are labeled as numbers for convenience, and the corresponding relationship is also shown in the figure.

Sn<sub>2</sub>' and Sn<sub>2</sub>'' are hydrolysis products of Sn<sub>2</sub>. (b) The molecular structures and formulas of Sn<sub>2</sub>' and

Sn<sub>2</sub>''.

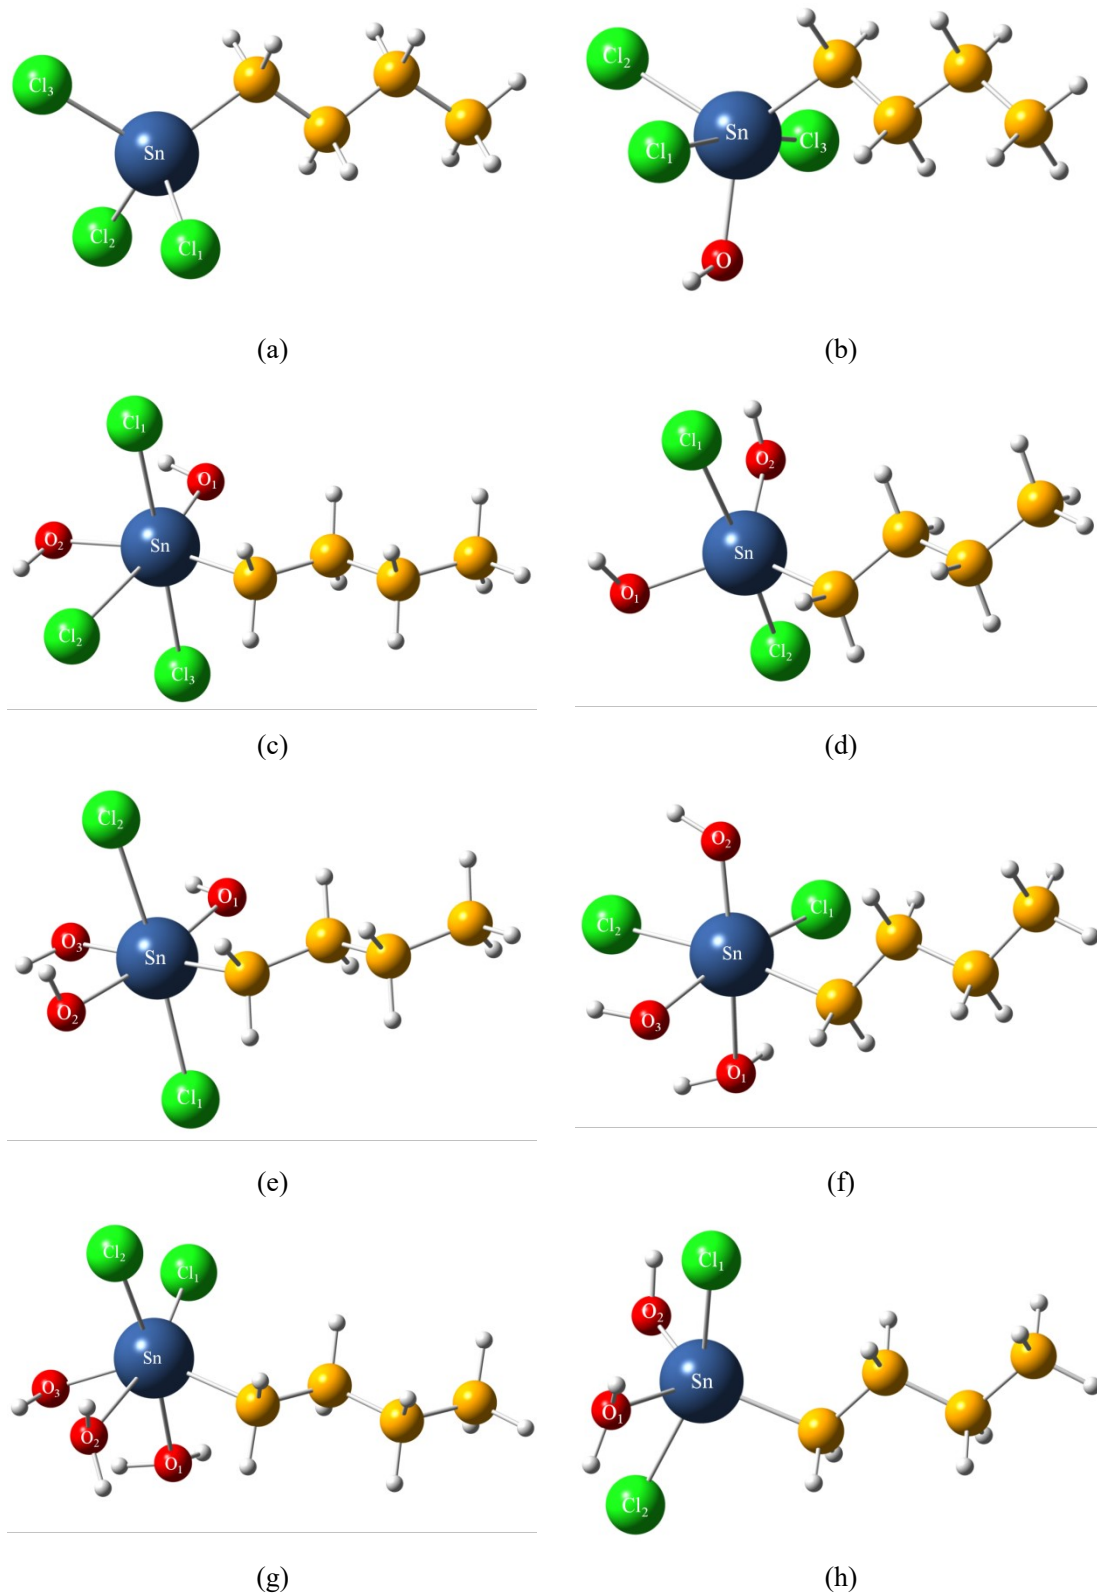

Figure S3. The molecular structures and atomic labels of (a)  $\text{BuSnCl}_3$  (b)  $[\text{BuSnCl}_3(\text{OH})]^-$  (c)  $[\text{BuSnCl}_3(\text{OH})_2]^{2-}$  (d)  $[\text{BuSnCl}_2(\text{OH})_2]^-$  (e)  $[\text{BuSnCl}_2(\text{OH})_3]^{2-}$  (f)  $[\text{BuSnCl}_2(\text{OH})_2(\text{H}_2\text{O})]^-$  (g)  $\text{BuSnCl}_2(\text{OH})(\text{H}_2\text{O})_2$  (h)  $\text{BuSnCl}_2(\text{OH})(\text{H}_2\text{O})$ .

**Table S1. Possible elementary reactions and corresponding  $\Delta G$  (kcal/mol) in Step 4.1.**

| Step 4.1                                                                                                                                  |            |
|-------------------------------------------------------------------------------------------------------------------------------------------|------------|
| Reaction                                                                                                                                  | $\Delta G$ |
| $[\text{BuSnCl}_3(\text{OH})(\text{H}_2\text{O})]^- \rightarrow [\text{BuSnCl}_3(\text{OH})]^- + \text{H}_2\text{O}$                      | -6.17      |
| $[\text{BuSnCl}_3(\text{OH})(\text{H}_2\text{O})]^- \rightarrow \text{BuSnCl}_3(\text{H}_2\text{O}) + \text{OH}^-$                        | 44.55      |
| $[\text{BuSnCl}_3(\text{OH})(\text{H}_2\text{O})]^- \rightarrow \text{BuSnCl}_2(\text{OH})(\text{H}_2\text{O}) + \text{Cl}^-$             | 2.76       |
| $[\text{BuSnCl}_3(\text{OH})(\text{H}_2\text{O})]^- + \text{H}^+ \rightarrow \text{BuSnCl}_3(\text{H}_2\text{O})_2$                       | -2.15      |
| $[\text{BuSnCl}_3(\text{OH})(\text{H}_2\text{O})]^- + \text{H}^+ \rightarrow \text{BuSnCl}_2(\text{OH})(\text{H}_2\text{O}) + \text{HCl}$ | 6.89       |

**Table S2. Possible elementary reactions and corresponding  $\Delta G$  (kcal/mol) in Step 4.2.**

| Step 4.2                                                                                                                 |            |
|--------------------------------------------------------------------------------------------------------------------------|------------|
| Reaction                                                                                                                 | $\Delta G$ |
| $[\text{BuSnCl}_2(\text{OH})_2]^- \rightarrow \text{BuSnCl}_2(\text{OH}) + \text{OH}^-$                                  | 46.35      |
| $[\text{BuSnCl}_2(\text{OH})_2]^- \rightarrow \text{BuSnCl}(\text{OH})_2 + \text{Cl}^-$                                  | 6.23       |
| $[\text{BuSnCl}_2(\text{OH})_2]^- + \text{H}^+ \rightarrow \text{BuSnCl}(\text{OH})_2 + \text{HCl}$                      | 10.36      |
| $[\text{BuSnCl}_2(\text{OH})_2]^- + \text{H}^+ \rightarrow \text{BuSnCl}_2(\text{OH})(\text{H}_2\text{O})$               | -6.69      |
| $[\text{BuSnCl}_2(\text{OH})_2]^- + \text{OH}^- \rightarrow [\text{BuSnCl}_2(\text{OH})_3]^{2-}$                         | -18.48     |
| $[\text{BuSnCl}_2(\text{OH})_2]^- + \text{H}_2\text{O} \rightarrow [\text{BuSnCl}_2(\text{OH})_2(\text{H}_2\text{O})]^-$ | 12.95      |
| $2[\text{BuSnCl}_2(\text{OH})_2]^- \rightarrow [(\text{BuSn})_2\text{Cl}_4(\text{OH})_4]^{2-}$                           | 12.01      |

**Table S3. Possible elementary reactions and corresponding  $\Delta G$  (kcal/mol) in Step 5.1.**

| Step 5.1                                                                                                                |            |
|-------------------------------------------------------------------------------------------------------------------------|------------|
| Reaction                                                                                                                | $\Delta G$ |
| $\text{BuSnCl}_3(\text{H}_2\text{O})_2 \rightarrow \text{BuSnCl}_3(\text{H}_2\text{O}) + \text{H}_2\text{O}$            | -9.23      |
| $\text{BuSnCl}_3(\text{H}_2\text{O})_2 \rightarrow [\text{BuSnCl}_2(\text{H}_2\text{O})_2]^+ + \text{Cl}^-$             | 14.30      |
| $\text{BuSnCl}_3(\text{H}_2\text{O})_2 + \text{H}^+ \rightarrow [\text{BuSnCl}_2(\text{H}_2\text{O})_2]^+ + \text{HCl}$ | 18.43      |

**Table S4. Possible elementary reactions and corresponding  $\Delta G$  (kcal/mol) in Step 5.2.**

| Step 5.2 |  |
|----------|--|
|----------|--|

| Reaction                                                                                                                                | $\Delta G$ |
|-----------------------------------------------------------------------------------------------------------------------------------------|------------|
| $\text{BuSnCl}_2(\text{OH})(\text{H}_2\text{O}) \rightarrow \text{BuSnCl}_2(\text{OH}) + \text{H}_2\text{O}$                            | -2.89      |
| $\text{BuSnCl}_2(\text{OH})(\text{H}_2\text{O}) \rightarrow [\text{BuSnCl}_2(\text{H}_2\text{O})]^+ + \text{OH}^-$                      | 71.25      |
| $\text{BuSnCl}_2(\text{OH})(\text{H}_2\text{O}) \rightarrow [\text{BuSnCl}(\text{OH})(\text{H}_2\text{O})]^+ + \text{Cl}^-$             | 27.65      |
| $\text{BuSnCl}_2(\text{OH})(\text{H}_2\text{O}) + \text{H}^+ \rightarrow [\text{BuSnCl}_2(\text{H}_2\text{O})_2]^+$                     | 9.39       |
| $\text{BuSnCl}_2(\text{OH})(\text{H}_2\text{O}) + \text{H}^+ \rightarrow [\text{BuSnCl}(\text{OH})(\text{H}_2\text{O})]^+ + \text{HCl}$ | 31.78      |
| $\text{BuSnCl}_2(\text{OH})(\text{H}_2\text{O}) + \text{OH}^- \rightarrow [\text{BuSnCl}_2(\text{OH})_2(\text{H}_2\text{O})]^-$         | -36.28     |
| $\text{BuSnCl}_2(\text{OH})(\text{H}_2\text{O}) + \text{H}_2\text{O} \rightarrow \text{BuSnCl}_2(\text{OH})(\text{H}_2\text{O})_2$      | 3.68       |
| $2\text{BuSnCl}_2(\text{OH})(\text{H}_2\text{O}) \rightarrow (\text{BuSn})_2\text{Cl}_4(\text{OH})_2(\text{H}_2\text{O})_2$             | -11.86     |

**Table S5. Possible elementary reactions and corresponding  $\Delta G$  (kcal/mol) in Step 5.3.**

| Step 5.3                                                                                                            |            |
|---------------------------------------------------------------------------------------------------------------------|------------|
| Reaction                                                                                                            | $\Delta G$ |
| $[\text{BuSnCl}_2(\text{OH})_3]^{2-} \rightarrow [\text{BuSnCl}_2(\text{OH})_2]^- + \text{OH}^-$                    | 18.48      |
| $[\text{BuSnCl}_2(\text{OH})_3]^{2-} \rightarrow [\text{BuSnCl}(\text{OH})_3]^- + \text{Cl}^-$                      | -15.01     |
| $[\text{BuSnCl}_2(\text{OH})_3]^{2-} + \text{H}^+ \rightarrow [\text{BuSnCl}_2(\text{OH})_2(\text{H}_2\text{O})]^-$ | -24.49     |
| $[\text{BuSnCl}_2(\text{OH})_3]^{2-} + \text{H}^+ \rightarrow [\text{BuSnCl}(\text{OH})_3]^- + \text{HCl}$          | -10.88     |

**Table S6. Possible elementary reactions and corresponding  $\Delta G$  (kcal/mol) in Step 6.1.**

| Step 6.1                                                                                                            |            |
|---------------------------------------------------------------------------------------------------------------------|------------|
| Reaction                                                                                                            | $\Delta G$ |
| $\text{BuSnCl}_3(\text{H}_2\text{O}) + \text{OH}^- \rightarrow [\text{BuSnCl}_3(\text{OH})(\text{H}_2\text{O})]^-$  | -44.55     |
| $\text{BuSnCl}_3(\text{H}_2\text{O}) + \text{H}_2\text{O} \rightarrow \text{BuSnCl}_3(\text{H}_2\text{O})_2$        | 9.23       |
| $\text{BuSnCl}_3(\text{H}_2\text{O}) + \text{H}^+ \rightarrow [\text{BuSnCl}_2(\text{H}_2\text{O})]^+ + \text{HCl}$ | 33.59      |
| $\text{BuSnCl}_3(\text{H}_2\text{O}) \rightarrow [\text{BuSnCl}_2(\text{H}_2\text{O})]^+ + \text{Cl}^-$             | 29.46      |
| $\text{BuSnCl}_3(\text{H}_2\text{O}) \rightarrow \text{BuSnCl}_3 + \text{H}_2\text{O}$                              | -4.09      |

**Table S7. Possible elementary reactions and corresponding  $\Delta G$  (kcal/mol) in Step 6.2.**

| Step 6.2 |  |
|----------|--|
|----------|--|

| Reaction                                                                                                                                 | $\Delta G$ |
|------------------------------------------------------------------------------------------------------------------------------------------|------------|
| $\text{BuSnCl}_2(\text{OH}) + \text{OH}^- \rightarrow [\text{BuSnCl}_2(\text{OH})_2]^-$                                                  | -46.35     |
| $\text{BuSnCl}_2(\text{OH}) + \text{H}_2\text{O} \rightarrow \text{BuSnCl}_2(\text{OH})(\text{H}_2\text{O})$                             | 2.89       |
| $\text{BuSnCl}_2(\text{OH}) + \text{H}^+ \rightarrow [\text{BuSnCl}_2(\text{H}_2\text{O})]^+$                                            | 18.21      |
| $2\text{BuSnCl}_2(\text{OH}) \rightarrow (\text{BuSn})_2\text{Cl}_4(\text{OH})_2$                                                        | -8.64      |
| $(\text{BuSn})_2\text{Cl}_4(\text{OH})_2 + 2\text{OH}^- \rightarrow [(\text{BuSn})_2\text{Cl}_4(\text{OH})_4]^{2-}$                      | -72.04     |
| $[(\text{BuSn})_2\text{Cl}_4(\text{OH})_4]^{2-} + 2\text{H}^+ \rightarrow (\text{BuSn})_2\text{Cl}_4(\text{OH})_2(\text{H}_2\text{O})_2$ | -37.25     |

**Table S8. Possible elementary reactions and corresponding  $\Delta G$  (kcal/mol) in Step 6.3.**

| Step 6.3                                                                                                                                    |            |
|---------------------------------------------------------------------------------------------------------------------------------------------|------------|
| Reaction                                                                                                                                    | $\Delta G$ |
| $[\text{BuSnCl}_2(\text{OH})_2(\text{H}_2\text{O})]^- \rightarrow [\text{BuSnCl}_2(\text{OH})_2]^- + \text{H}_2\text{O}$                    | -12.95     |
| $[\text{BuSnCl}_2(\text{OH})_2(\text{H}_2\text{O})]^- \rightarrow \text{BuSnCl}_2(\text{OH})(\text{H}_2\text{O}) + \text{OH}^-$             | 36.28      |
| $[\text{BuSnCl}_2(\text{OH})_2(\text{H}_2\text{O})]^- \rightarrow \text{BuSnCl}(\text{OH})_2(\text{H}_2\text{O}) + \text{Cl}^-$             | -5.98      |
| $[\text{BuSnCl}_2(\text{OH})_2(\text{H}_2\text{O})]^- + \text{H}^+ \rightarrow \text{BuSnCl}(\text{OH})_2(\text{H}_2\text{O}) + \text{HCl}$ | -1.85      |
| $[\text{BuSnCl}_2(\text{OH})_2(\text{H}_2\text{O})]^- + \text{H}^+ \rightarrow \text{BuSnCl}_2(\text{OH})(\text{H}_2\text{O})_2$            | -15.97     |

**Table S9. Possible elementary reactions and corresponding  $\Delta G$  (kcal/mol) in Step 6.4.**

| Step 6.4                                                                                                             |            |
|----------------------------------------------------------------------------------------------------------------------|------------|
| Reaction                                                                                                             | $\Delta G$ |
| $[\text{BuSnCl}(\text{OH})_3]^- \rightarrow \text{BuSnCl}(\text{OH})_2 + \text{OH}^-$                                | 39.11      |
| $[\text{BuSnCl}(\text{OH})_3]^- \rightarrow \text{BuSn}(\text{OH})_3 + \text{Cl}^-$                                  | -0.67      |
| $[\text{BuSnCl}(\text{OH})_3]^- + \text{H}_2\text{O} \rightarrow [\text{BuSnCl}(\text{OH})_3(\text{H}_2\text{O})]^-$ | 12.18      |
| $[\text{BuSnCl}(\text{OH})_3]^- + \text{H}^+ \rightarrow \text{BuSn}(\text{OH})_3 + \text{HCl}$                      | 3.45       |
| $[\text{BuSnCl}(\text{OH})_3]^- + \text{H}^+ \rightarrow \text{BuSnCl}(\text{OH})_2(\text{H}_2\text{O})$             | -15.46     |
| $2[\text{BuSnCl}(\text{OH})_3]^- \rightarrow [(\text{BuSn})_2\text{Cl}_2(\text{OH})_6]^{2-}$                         | 0.65       |

**Table S10. Possible elementary reactions and corresponding  $\Delta G$  (kcal/mol) in Step 7.1.**

| Step 7.1 |  |
|----------|--|
|----------|--|

| Reaction                                                                                                                                    | $\Delta G$ |
|---------------------------------------------------------------------------------------------------------------------------------------------|------------|
| $\text{BuSnCl}_2(\text{OH})(\text{H}_2\text{O})_2 \rightarrow \text{BuSnCl}_2(\text{OH})(\text{H}_2\text{O}) + \text{H}_2\text{O}$          | -3.68      |
| $\text{BuSnCl}_2(\text{OH})(\text{H}_2\text{O})_2 \rightarrow [\text{BuSnCl}_2(\text{H}_2\text{O})_2]^+ + \text{OH}^-$                      | 61.64      |
| $\text{BuSnCl}_2(\text{OH})(\text{H}_2\text{O})_2 \rightarrow [\text{BuSnCl}(\text{OH})(\text{H}_2\text{O})_2]^+ + \text{Cl}^-$             | 17.17      |
| $\text{BuSnCl}_2(\text{OH})(\text{H}_2\text{O})_2 + \text{H}^+ \rightarrow [\text{BuSnCl}(\text{OH})(\text{H}_2\text{O})_2]^+ + \text{HCl}$ | 21.30      |
| $\text{BuSnCl}_2(\text{OH})(\text{H}_2\text{O})_2 + \text{H}^+ \rightarrow [\text{BuSnCl}_2(\text{H}_2\text{O})_3]^+$                       | 9.30       |

**Table S11. Possible elementary reactions and corresponding  $\Delta G$  (kcal/mol) in Step 7.2.**

| Step 7.2                                                                                                                                |            |
|-----------------------------------------------------------------------------------------------------------------------------------------|------------|
| Reaction                                                                                                                                | $\Delta G$ |
| $\text{BuSnCl}(\text{OH})_2(\text{H}_2\text{O}) \rightarrow [\text{BuSnCl}(\text{OH})(\text{H}_2\text{O})]^+ + \text{OH}^-$             | 69.91      |
| $\text{BuSnCl}(\text{OH})_2(\text{H}_2\text{O}) \rightarrow \text{BuSnCl}(\text{OH})_2 + \text{H}_2\text{O}$                            | -1.35      |
| $\text{BuSnCl}(\text{OH})_2(\text{H}_2\text{O}) \rightarrow [\text{BuSn}(\text{OH})_2(\text{H}_2\text{O})]^+ + \text{Cl}^-$             | 26.17      |
| $\text{BuSnCl}(\text{OH})_2(\text{H}_2\text{O}) + \text{OH}^- \rightarrow [\text{BuSnCl}(\text{OH})_3(\text{H}_2\text{O})]^-$           | -28.28     |
| $\text{BuSnCl}(\text{OH})_2(\text{H}_2\text{O}) + \text{H}_2\text{O} \rightarrow \text{BuSnCl}(\text{OH})_2(\text{H}_2\text{O})_2$      | 8.67       |
| $\text{BuSnCl}(\text{OH})_2(\text{H}_2\text{O}) + \text{H}^+ \rightarrow [\text{BuSn}(\text{OH})_2(\text{H}_2\text{O})]^+ + \text{HCl}$ | 30.30      |
| $\text{BuSnCl}(\text{OH})_2(\text{H}_2\text{O}) + \text{H}^+ \rightarrow [\text{BuSnCl}(\text{OH})(\text{H}_2\text{O})_2]^+$            | 7.18       |
| $2\text{BuSnCl}(\text{OH})_2(\text{H}_2\text{O}) \rightarrow (\text{BuSn})_2\text{Cl}_2(\text{OH})_4(\text{H}_2\text{O})_2$             | -9.63      |

**Table S12. Possible elementary reactions and corresponding  $\Delta G$  (kcal/mol) in Step 7.3.**

| Step 7.3                                                                                                           |            |
|--------------------------------------------------------------------------------------------------------------------|------------|
| Reaction                                                                                                           | $\Delta G$ |
| $\text{BuSn}(\text{OH})_3 + \text{OH}^- \rightarrow [\text{BuSn}(\text{OH})_4]^-$                                  | -28.73     |
| $\text{BuSn}(\text{OH})_3 + \text{H}_2\text{O} \rightarrow \text{BuSn}(\text{OH})_3(\text{H}_2\text{O})$           | 3.16       |
| $\text{BuSn}(\text{OH})_3 + \text{H}^+ \rightarrow [\text{BuSn}(\text{OH})_2(\text{H}_2\text{O})]^+$               | 11.39      |
| $2\text{BuSn}(\text{OH})_3 \rightarrow (\text{BuSn})_2(\text{OH})_6$                                               | -5.73      |
| $(\text{BuSn})_2(\text{OH})_6 + 2\text{OH}^- \rightarrow [(\text{BuSn})_2(\text{OH})_8]^{2-}$                      | -51.45     |
| $[(\text{BuSn})_2(\text{OH})_8]^{2-} + 2\text{H}^+ \rightarrow (\text{BuSn})_2(\text{OH})_6(\text{H}_2\text{O})_2$ | -56.86     |

**Table S13. Possible elementary reactions and corresponding  $\Delta G$  (kcal/mol) in Step 8.1.**

| Step 8.1                                                                                                                                 |            |
|------------------------------------------------------------------------------------------------------------------------------------------|------------|
| Reaction                                                                                                                                 | $\Delta G$ |
| $\text{BuSnCl(OH)}_2 + \text{OH}^- \rightarrow [\text{BuSnCl(OH)}_3]^-$                                                                  | -39.11     |
| $\text{BuSnCl(OH)}_2 + \text{H}_2\text{O} \rightarrow \text{BuSnCl(OH)}_2(\text{H}_2\text{O})$                                           | 1.35       |
| $\text{BuSnCl(OH)}_2 + \text{H}^+ \rightarrow [\text{BuSnCl(OH)(H}_2\text{O)}]^+$                                                        | 15.34      |
| $2\text{BuSnCl(OH)}_2 \rightarrow (\text{BuSn})_2\text{Cl}_2(\text{OH})_4$                                                               | -10.09     |
| $(\text{BuSn})_2\text{Cl}_2(\text{OH})_4 + 2\text{OH}^- \rightarrow [(\text{BuSn})_2\text{Cl}_2(\text{OH})_6]^{2-}$                      | -68.56     |
| $[(\text{BuSn})_2\text{Cl}_2(\text{OH})_6]^{2-} + 2\text{H}^+ \rightarrow (\text{BuSn})_2\text{Cl}_2(\text{OH})_4(\text{H}_2\text{O})_2$ | -40.12     |

**Table S14. Possible elementary reactions and corresponding  $\Delta G$  (kcal/mol) in Step 8.2.**

| Step 8.2                                                                                                                  |            |
|---------------------------------------------------------------------------------------------------------------------------|------------|
| Reaction                                                                                                                  | $\Delta G$ |
| $[\text{BuSnCl(OH)}_3(\text{H}_2\text{O})]^- \rightarrow [\text{BuSnCl(OH)}_3]^- + \text{H}_2\text{O}$                    | -12.18     |
| $[\text{BuSnCl(OH)}_3(\text{H}_2\text{O})]^- \rightarrow \text{BuSnCl(OH)}_2(\text{H}_2\text{O}) + \text{OH}^-$           | 28.28      |
| $[\text{BuSnCl(OH)}_3(\text{H}_2\text{O})]^- \rightarrow \text{BuSn(OH)}_3(\text{H}_2\text{O}) + \text{Cl}^-$             | -9.70      |
| $[\text{BuSnCl(OH)}_3(\text{H}_2\text{O})]^- + \text{H}^+ \rightarrow \text{BuSn(OH)}_3(\text{H}_2\text{O}) + \text{HCl}$ | -5.57      |
| $[\text{BuSnCl(OH)}_3(\text{H}_2\text{O})]^- + \text{H}^+ \rightarrow \text{BuSnCl(OH)}_2(\text{H}_2\text{O})_2$          | -18.98     |

**Table S15. Possible elementary reactions and corresponding  $\Delta G$  (kcal/mol) in Step 8.3.**

| Step 8.3                                                                               |            |
|----------------------------------------------------------------------------------------|------------|
| Reaction                                                                               | $\Delta G$ |
| $[\text{BuSn(OH)}_4]^- \rightarrow \text{BuSn(OH)}_3 + \text{OH}^-$                    | 28.73      |
| $[\text{BuSn(OH)}_4]^- + \text{OH}^- \rightarrow [\text{BuSn(OH)}_5]^{2-}$             | -9.27      |
| $[\text{BuSn(OH)}_4]^- + \text{H}^+ \rightarrow \text{BuSn(OH)}_3(\text{H}_2\text{O})$ | -24.04     |
| $2[\text{BuSn(OH)}_4]^- \rightarrow [(\text{BuSn})_2(\text{OH})_8]^{2-}$               | 0.29       |

**Table S16. Possible elementary reactions and corresponding  $\Delta G$  (kcal/mol) in Step 9.1.**

| Step 9.1 |            |
|----------|------------|
| Reaction | $\Delta G$ |



|                                                                                                                  |       |
|------------------------------------------------------------------------------------------------------------------|-------|
| $\text{BuSn(OH)}_3(\text{H}_2\text{O}) \rightarrow \text{BuSn(OH)}_3 + \text{H}_2\text{O}$                       | -3.16 |
| $\text{BuSn(OH)}_3(\text{H}_2\text{O}) \rightarrow [\text{BuSn(OH)}_2(\text{H}_2\text{O})]^+ + \text{OH}^-$      | 64.15 |
| $\text{BuSn(OH)}_3(\text{H}_2\text{O}) + \text{H}_2\text{O} \rightarrow \text{BuSn(OH)}_3(\text{H}_2\text{O})_2$ | 16.47 |
| $\text{BuSn(OH)}_3(\text{H}_2\text{O}) + \text{H}^+ \rightarrow [\text{BuSn(OH)}_2(\text{H}_2\text{O})_2]^+$     | 2.54  |
| $2\text{BuSn(OH)}_3(\text{H}_2\text{O}) \rightarrow (\text{BuSn})_2(\text{OH})_6(\text{H}_2\text{O})_2$          | -8.50 |

**Table S17. Possible elementary reactions and corresponding  $\Delta G$  (kcal/mol) in Step 9.2.**

| Step 9.2                                                                                                                      |            |
|-------------------------------------------------------------------------------------------------------------------------------|------------|
| Reaction                                                                                                                      | $\Delta G$ |
| $\text{BuSnCl(OH)}_2(\text{H}_2\text{O})_2 \rightarrow \text{BuSnCl(OH)}_2(\text{H}_2\text{O}) + \text{H}_2\text{O}$          | -8.67      |
| $\text{BuSnCl(OH)}_2(\text{H}_2\text{O})_2 \rightarrow [\text{BuSnCl(OH)}(\text{H}_2\text{O})_2]^+ + \text{OH}^-$             | 54.44      |
| $\text{BuSnCl(OH)}_2(\text{H}_2\text{O})_2 \rightarrow [\text{BuSn(OH)}_2(\text{H}_2\text{O})_2]^+ + \text{Cl}^-$             | 11.82      |
| $\text{BuSnCl(OH)}_2(\text{H}_2\text{O})_2 + \text{H}^+ \rightarrow [\text{BuSn(OH)}_2(\text{H}_2\text{O})_2]^+ + \text{HCl}$ | 15.95      |
| $\text{BuSnCl(OH)}_2(\text{H}_2\text{O})_2 + \text{H}^+ \rightarrow [\text{BuSnCl(OH)}(\text{H}_2\text{O})_3]^+$              | 2.54       |

**Table S18. Possible elementary reaction and corresponding  $\Delta G$  (kcal/mol) in Step 9.3.**

| Step 9.3                                                                   |            |
|----------------------------------------------------------------------------|------------|
| Reaction                                                                   | $\Delta G$ |
| $[\text{BuSn(OH)}_5]^{2-} \rightarrow [\text{BuSn(OH)}_4]^- + \text{OH}^-$ | 9.27       |

**Table S19. The Mulliken atomic charge population and Mayer bond order analysis results of**

| BuSnCl <sub>3</sub> . |                        |
|-----------------------|------------------------|
| Atom                  | Mulliken Atomic Charge |
| Sn                    | 1.16                   |
| Cl <sub>1</sub>       | -0.38                  |
| Cl <sub>2</sub>       | -0.39                  |
| Cl <sub>3</sub>       | -0.39                  |
| Bond                  | Mayer Bond Order       |
| Sn-Cl <sub>1</sub>    | 0.90                   |

|                    |      |
|--------------------|------|
| Sn-Cl <sub>2</sub> | 0.89 |
| Sn-Cl <sub>3</sub> | 0.89 |

**Table S20. The Mulliken atomic charge population and Mayer bond order analysis results of [BuSnCl<sub>3</sub>(OH)]<sup>-</sup>.**

| Atom               | Mulliken Atomic Charge |
|--------------------|------------------------|
| Sn                 | 1.17                   |
| Cl <sub>1</sub>    | -0.62                  |
| Cl <sub>2</sub>    | -0.46                  |
| Cl <sub>3</sub>    | -0.58                  |
| O                  | -0.73                  |
| Bond               | Mayer Bond Order       |
| Sn-Cl <sub>1</sub> | 0.58                   |
| Sn-Cl <sub>2</sub> | 0.81                   |
| Sn-Cl <sub>3</sub> | 0.67                   |
| Sn-O               | 0.84                   |

**Table S21. The Mulliken atomic charge population and Mayer bond order analysis results of [BuSnCl<sub>3</sub>(OH)<sub>2</sub>]<sup>2-</sup>.**

| Atom               | Mulliken Atomic Charge |
|--------------------|------------------------|
| Sn                 | 1.25                   |
| Cl <sub>1</sub>    | -0.68                  |
| Cl <sub>2</sub>    | -0.77                  |
| Cl <sub>3</sub>    | -0.68                  |
| O <sub>1</sub>     | -0.81                  |
| O <sub>2</sub>     | -0.75                  |
| Bond               | Mayer Bond Order       |
| Sn-Cl <sub>1</sub> | 0.53                   |
| Sn-Cl <sub>2</sub> | 0.32                   |

|                    |      |
|--------------------|------|
| Sn-Cl <sub>3</sub> | 0.52 |
| Sn-O <sub>1</sub>  | 0.76 |
| Sn-O <sub>2</sub>  | 0.82 |

**Table S22. The Mulliken atomic charge population and Mayer bond order analysis results of [BuSnCl<sub>2</sub>(OH)<sub>2</sub>]<sup>-</sup>.**

| Atom               | Mulliken Atomic Charge |
|--------------------|------------------------|
| Sn                 | 1.26                   |
| Cl <sub>1</sub>    | -0.66                  |
| Cl <sub>2</sub>    | -0.59                  |
| O <sub>1</sub>     | -0.75                  |
| O <sub>2</sub>     | -0.76                  |
| Bond               | Mayer Bond Order       |
| Sn-Cl <sub>1</sub> | 0.51                   |
| Sn-Cl <sub>2</sub> | 0.67                   |
| Sn-O <sub>1</sub>  | 0.83                   |
| Sn-O <sub>2</sub>  | 0.81                   |

**Table S23. The Mulliken atomic charge population and Mayer bond order analysis results of [BuSnCl<sub>2</sub>(OH)<sub>3</sub>]<sup>2-</sup>.**

| Atom               | Mulliken Atomic Charge |
|--------------------|------------------------|
| Sn                 | 1.36                   |
| Cl <sub>1</sub>    | -0.69                  |
| Cl <sub>2</sub>    | -0.74                  |
| O <sub>1</sub>     | -0.84                  |
| O <sub>2</sub>     | -0.86                  |
| O <sub>3</sub>     | -0.83                  |
| Bond               | Mayer Bond Order       |
| Sn-Cl <sub>1</sub> | 0.52                   |

|                    |      |
|--------------------|------|
| Sn-Cl <sub>2</sub> | 0.42 |
| Sn-O <sub>1</sub>  | 0.69 |
| Sn-O <sub>2</sub>  | 0.61 |
| Sn-O <sub>3</sub>  | 0.75 |

**Table S24. The Mulliken atomic charge population and Mayer bond order analysis results of [BuSnCl<sub>2</sub>(OH)<sub>2</sub>(H<sub>2</sub>O)]<sup>-</sup>.**

| Atom               | Mulliken Atomic Charge |
|--------------------|------------------------|
| Sn                 | 1.30                   |
| Cl <sub>1</sub>    | -0.64                  |
| Cl <sub>2</sub>    | -0.59                  |
| O <sub>1</sub>     | -0.62                  |
| O <sub>2</sub>     | -0.78                  |
| O <sub>3</sub>     | -0.79                  |
| Bond               | Mayer Bond Order       |
| Sn-Cl <sub>1</sub> | 0.53                   |
| Sn-Cl <sub>2</sub> | 0.59                   |
| Sn-O <sub>1</sub>  | 0.21                   |
| Sn-O <sub>2</sub>  | 0.79                   |
| Sn-O <sub>3</sub>  | 0.79                   |

**Table S25. The Mulliken atomic charge population and Mayer bond order analysis results of BuSnCl<sub>2</sub>(OH)(H<sub>2</sub>O)<sub>2</sub>.**

| Atom            | Mulliken Atomic Charge |
|-----------------|------------------------|
| Sn              | 1.26                   |
| Cl <sub>1</sub> | -0.48                  |
| Cl <sub>2</sub> | -0.50                  |
| O <sub>1</sub>  | -0.64                  |
| O <sub>2</sub>  | -0.66                  |

|                    |                  |
|--------------------|------------------|
| O <sub>3</sub>     | -0.74            |
| Bond               | Mayer Bond Order |
| Sn-Cl <sub>1</sub> | 0.79             |
| Sn-Cl <sub>2</sub> | 0.77             |
| Sn-O <sub>1</sub>  | 0.20             |
| Sn-O <sub>2</sub>  | 0.11             |
| Sn-O <sub>3</sub>  | 0.84             |

**Table S26. The Mulliken atomic charge population and Mayer bond order analysis results of BuSnCl<sub>2</sub>(OH)(H<sub>2</sub>O).**

|                    |                        |
|--------------------|------------------------|
| Atom               | Mulliken Atomic Charge |
| Sn                 | 1.27                   |
| Cl <sub>1</sub>    | -0.52                  |
| Cl <sub>2</sub>    | -0.52                  |
| O <sub>1</sub>     | -0.59                  |
| O <sub>2</sub>     | -0.70                  |
| Bond               | Mayer Bond Order       |
| Sn-Cl <sub>1</sub> | 0.70                   |
| Sn-Cl <sub>2</sub> | 0.74                   |
| Sn-O <sub>1</sub>  | 0.31                   |
| Sn-O <sub>2</sub>  | 0.89                   |
